# Supplementary material for: Identification, Characterization, and Genome Analysis of Two Novel Temperate Pseudomonas protegens Phages PseuP_222 and PseuP_224
Source: MDPI journal article supplement (doi:10.3390/microorganisms11061456), 2023-05-31
Supplement: s1 [file s1]

Table S2. *Pseudomonas* strains screened in host range assay

| #   | Species name          | CEMTC # | GenBank accession # | PseP_222            | PseP_224            | Sample, geographical location                                       |
|-----|-----------------------|---------|---------------------|---------------------|---------------------|---------------------------------------------------------------------|
| 1   | <i>P. protegens</i>   | 3668    | MT040048            |                     |                     | insect larvae, Novosibirsk Region                                   |
| 2   |                       | 3669    | MT040049            |                     |                     | insect larvae, Novosibirsk Region                                   |
| 3   |                       | 3758    | OP541587            |                     |                     | clinical sample, Novosibirsk                                        |
| 4   |                       | 4060    | ON838113            | 1.0×10 <sup>7</sup> | 1.8×10 <sup>7</sup> | water, Inya river, Novosibirsk Region                               |
| 5   |                       | 4377    | OP602247            |                     |                     | pond water, Novosibirsk                                             |
| 6   |                       | 4496    | ON838131            |                     |                     | water of a mineral waterfall with hydrogen sulfide, Sakhalin Island |
| 7   |                       | 4502    | OP649444            |                     |                     | pond water, Novosibirsk Region                                      |
| 8   |                       | 4556    | OP602256            |                     |                     | water, Malinovskoe lake, Novosibirsk Region                         |
| 9   |                       | 4731    | ON838132            |                     |                     | water with hydrogen sulfide, Sakhalin Island                        |
| 10  |                       | 5980    | OP649446            |                     | 2.0×10 <sup>6</sup> | water, Novosibirsk Reservoir (Ob Sea), Novosibirsk Region           |
| 11  | <i>P. aeruginosa</i>  | 38      |                     |                     |                     | ATCC strain 9027                                                    |
| 12  |                       | 671     |                     |                     |                     | soil from a poultry farm, Novosibirsk Region                        |
| 13  |                       | 1125    | OP800156            |                     |                     | geothermal water, Uzon volcano caldera, Kamchatka Peninsula         |
| 14  |                       | 1589    | OP800159            |                     |                     | sewage, Novosibirsk                                                 |
| 15  |                       | 2273    | OP602241            |                     |                     | soil from a poultry farm, Kemerovo Region                           |
| 16  |                       | 3518    |                     |                     |                     | clinical sample, Novosibirsk                                        |
| 17  |                       | 3525    |                     |                     |                     | clinical sample, Novosibirsk                                        |
| 18  |                       | 3527    |                     |                     |                     | clinical sample, Novosibirsk                                        |
| 19  |                       | 3532    | OP541585            |                     |                     | clinical sample, Novosibirsk                                        |
| 20  |                       | 3536    | OP541586            |                     |                     | clinical sample, Novosibirsk                                        |
| 21  |                       | 3623    |                     |                     |                     | clinical sample, Novosibirsk                                        |
| 22  |                       | 3671    | MT040050            |                     |                     | insect larvae, Novosibirsk                                          |
| 23  |                       | 3823    | OP541588            |                     |                     | clinical sample, Novosibirsk                                        |
| 24  |                       | 3931    | OP541589            |                     |                     | clinical sample, Novosibirsk                                        |
| 25  |                       | 3943    | OP541591            |                     |                     | clinical sample, Kemerovo                                           |
| 26  |                       | 3962    | OP541593            |                     |                     | clinical sample, Novosibirsk                                        |
| 27  |                       | 4147    | OP541595            |                     |                     | clinical sample, Novosibirsk                                        |
| 28  |                       | 4174    | OP649442            |                     |                     | clinical sample, Novosibirsk                                        |
| 29  |                       | 4180    | OP541596            |                     |                     | clinical sample, Novosibirsk                                        |
| 30  |                       | 4196    | OP602244            |                     |                     | soil from a poultry farm, Novosibirsk Region                        |
| 31  |                       | 4622    |                     |                     |                     | clinical sample, Novosibirsk                                        |
| 32  |                       | 4716    |                     |                     |                     | clinical sample, Novosibirsk                                        |
| 33  |                       | 5095    |                     |                     |                     | clinical sample, Novosibirsk                                        |
| 34  |                       | 5199    | OP541599            |                     |                     | clinical sample, Novosibirsk                                        |
| 35* | <i>P. alcaligenes</i> | 4061    | ON838114            |                     |                     | water, Inya river, Novosibirsk Region                               |
| 36  | <i>P. alcaliphila</i> | 4332    | ON838118            |                     |                     | water, Uryupino lake, Novosibirsk Region                            |

|    |                                     |      |          |                                                                    |
|----|-------------------------------------|------|----------|--------------------------------------------------------------------|
| 37 | <i>P. amygdali</i>                  | 4483 | OP649443 | water from a mineral spring with hydrogen sulfide, Sakhalin Island |
| 38 | <i>P. azotoformans</i>              | 1853 | OP602239 | onion bulb, Novosibirsk                                            |
| 39 |                                     | 2046 | OP602240 | water from a spring, Novosibirsk Region                            |
| 40 |                                     | 4494 | OP602250 | mineral springs waterfall with hydrogen sulfide, Sakhalin Island   |
| 41 |                                     | 4676 | OP602260 | pond silt, Novosibirsk Region                                      |
| 42 |                                     | 4986 | OP602263 | sawdust-soil compost, Krasnoyarsk Region                           |
| 43 | <i>P. brassicacearum</i>            | 4542 | ON838134 | soil, reclamation for 30 years, Kemerovo Region                    |
| 44 |                                     | 4547 | OP800165 | soil, reclamation for 2 years, Kemerovo Region                     |
| 45 |                                     | 4664 | OP602259 | soil, reclamation for 2 years, Kemerovo Region                     |
| 46 |                                     | 5281 | OP602266 | park soil, Sakhalin Island                                         |
| 47 |                                     | 5298 | OP602268 | lawn soil, Sakhalin Island                                         |
| 48 |                                     | 6459 | OP800178 | forest soil, Kemerovo Region                                       |
| 49 |                                     | 6480 | OP800179 | potato field soil, Kemerovo Region                                 |
| 50 | <i>P. canadensis</i>                | 4675 |          | pond silt, Novosibirsk                                             |
| 51 | <i>P. chengduensis</i> /" <i>P.</i> | 1363 | OP800158 | lake water, Altai Region                                           |
| 52 | <i>indoloxydans</i> "               | 4505 | OP800164 | pond silt, Novosibirsk                                             |
| 53 | <i>P. extremaustralis</i>           | 4495 | OP800163 | water of a mineral spring with hydrogen sulfide, Sakhalin Island   |
| 54 |                                     | 5453 | OP602275 | water, Sema river, Altai Republic                                  |
| 55 |                                     | 5458 | OP602276 | silt of lake Geysernoe, Altai Republic                             |
| 56 | <i>P. extremorientalis</i>          | 3888 | OP800160 | soil of Uedinenia Island, Kara Sea                                 |
| 57 |                                     | 4493 | OP800162 | water of a mineral spring with hydrogen sulfide, Sakhalin Island   |
| 58 |                                     | 5477 | OP800174 | water, Krutikha river, Novosibirsk Region                          |
| 59 | <i>P. fluorescens</i>               | 42   |          | rhizosphere                                                        |
| 60 |                                     | 1239 | OP602236 | water, Fumarolnoye lake, Uzon volcano caldera, Kamchatka Peninsula |
| 61 |                                     | 4536 | OP602253 | lake water, Novosibirsk Region                                     |
| 62 | <i>P. frederiksbergensis</i>        | 4488 | OP800161 | soil near a mineral spring, Sakhalin Island                        |
| 63 |                                     | 4670 | OP800166 | river water, Novosibirsk Region                                    |
| 64 |                                     | 4800 | OP800168 | agricultural soil, Volgograd Region                                |
| 65 |                                     | 4994 | OP800169 | silt of Lake Geysernoe, Altai Republic                             |
| 66 |                                     | 5252 | OP800170 | overburden dump, Republic of Sakha (Yakutia)                       |
| 67 |                                     | 5451 | OP800172 | water, Sema river, Altai Republic                                  |
| 68 |                                     | 5455 | OP800173 | Silt, Geysernoe Lake, Altai Republic                               |
| 69 |                                     | 5940 | OP800176 | water, Novosibirsk reservoir (Ob Sea), Novosibirsk Region          |

|     |                                                  |      |          |                                                                             |
|-----|--------------------------------------------------|------|----------|-----------------------------------------------------------------------------|
| 70  |                                                  | 6501 | OP800180 | soil, Kemerovo Region                                                       |
| 71  | <i>P. germanica</i>                              | 5598 | OP800175 | microbial mat, mineral spring with hydrogen sulfide, Sakhalin Island        |
| 72  | <i>P. jessenii</i>                               | 4640 | ON838147 | water, Chermal river, Altai Republic                                        |
| 73* | <i>P. khazarica</i>                              | 4063 |          | water, Inya river, Novosibirsk Region                                       |
| 74  | <i>P. kilonensis</i>                             | 4783 | OP800167 | natural pasture soil, Stavropol Region                                      |
| 75  | <i>P. koreensis</i>                              | 1236 | OP800157 | geothermal water, Uzon volcano caldera, Kamchatka Peninsula                 |
| 76  |                                                  | 6502 | OP800181 | soil, Kemerovo Region                                                       |
| 77  |                                                  | 6543 | OP800184 | pond silt, Lipetsk Region                                                   |
| 78  | <i>P. mandelii</i>                               | 1488 | OP602237 | underground cold storage in the permafrost, Republic of Sakha (Yakutia)     |
| 79  |                                                  | 4522 | OP602252 | pond water, Novosibirsk                                                     |
| 80  |                                                  | 4557 | OP602257 | water, Malinovskoe lake, Novosibirsk Region                                 |
| 81  |                                                  | 4996 | OP602264 | water, Geysernoe Lake, Altai Republic                                       |
| 82  | <i>P. phaseolicola</i>                           |      |          | strain ATCC 21781                                                           |
| 83  | <i>P. resinovorans</i>                           | 6563 | OP800185 | water, Psakho river, Sochi                                                  |
| 84  | <i>Pseudomonas</i> sp. ( <i>P. edaphica</i> )    | 4489 | OP602249 | bottom sediments of a mineral spring, Sakhalin Island                       |
| 85  | <i>Pseudomonas</i> sp. ( <i>P. endophytica</i> ) | 4577 | OP602258 | pond silt, Novosibirsk Region                                               |
| 86  | <i>Pseudomonas</i> sp. ( <i>P. grimontii</i> )   | 4833 | OP602261 | swampy soil, Chany lake, Novosibirsk Region                                 |
| 87  | <i>P. savastanoi</i>                             | 4361 | OP602246 | bottom sediments of a mineral spring with hydrogen sulfide, Sakhalin Island |
| 88  | <i>P. syringae</i> group                         | 4541 | OP602254 | fresh dumps of coal mines, Kemerovo Region                                  |
| 89  | <i>P. thivervalensis</i>                         | 4477 | OP602248 | bottom sediments of a mineral spring with hydrogen sulfide, Sakhalin Island |
| 90  |                                                  | 5078 | OP649445 | steppe soil, Stavropol Region                                               |
| 91  | <i>P. veronii</i>                                | 5286 | OP800171 | water, Deputatka stream, Republic of Sakha (Yakutia)                        |
| 92  |                                                  | 5952 | OP800177 | water of a stream, Primorsky Region                                         |
| 93  |                                                  | 6513 | OP800182 | water, Sema river, Altai Republic                                           |
| 94  |                                                  | 6527 | OP800183 | water of a stream, Primorsky Region                                         |
| 95  |                                                  | 6693 | OP800186 | water, Staroe lake, Vladivostok                                             |
