# Supplementary material for: Identification, Characterization, and Genome Analysis of Two Novel Temperate Pseudomonas protegens Phages PseuP_222 and PseuP_224
Source: MDPI journal article supplement (doi:10.3390/microorganisms11061456), 2023-05-31
Supplement: s1 [file s1]

**Table S1.** Primers for PCR

| Target genes | Primer sequences (5' → 3')                                                      | Annealing temperature | Reference |
|--------------|---------------------------------------------------------------------------------|-----------------------|-----------|
| 16S rRNA     | 8F: AGRGTTTGATCCTGGCTCA<br>1350R: 5`-GACGGGCGGTGTGTACAAG                        | 55°C                  | [21]      |
| <i>rpoD</i>  | rpoDf: ACTTCCCTGGCACGGTTGACCA<br>rpoDr: TCGACATGCGACGGTTGATGTC                  | 60°C                  | [22]      |
| <i>gyrB</i>  | gyrBf: TTCAGCTGGGACATCCTGGCCAA<br>gyrBr: TCGATCATCTTGCCGACRACCA                 | 65°C                  | [22]      |
| <i>fdxA</i>  | <i>fdxA</i> f: TGCCTCGACGGAYAGACAC<br><i>fdxA</i> Ar: GTCGTCACCGACAACCTGCATCAAG | 65°C                  | [22]      |
